# Supplementary material
Source: PubMed Central journal article supplement (PMC2855757)
Supplement: NIHMS179667-supplement-Legend_to_Supplemental_Figures.pdf [file NIHMS179667-supplement-Legend_to_Supplemental_Figures.pdf]

## Legend to Supplemental Figure S1

**Fig. S1.** Cell viability (A) and cytoplasmic histone-associated DNA fragmentation (B) in p66-WT and p66-KO cells following 4 h treatment with DMSO (control) or the indicated concentrations of benzyl isothiocyanate (BITC). Results are expressed as enrichment factor relative to DMSO-treated control. Each experiment was done at least twice in triplicate and representative data from a single experiment are shown. *Columns*, mean (n=3); *bars*, SE.

\*Significantly different ( $P<0.05$ ) between the indicated groups by paired *t*-test.

**Fig. S2.** A, immunoblotting for Ser36 phosphorylated p66<sup>Shc</sup> using lysates from PC-3 cells following 24 h of co-treatment with the indicated concentrations of PEITC and/or PKC $\beta$  inhibitor (PKC $\beta$ -I). The blot was stripped and re-probed with anti-actin antibody to ensure equal protein loading. The numbers on top of the immunoreactive bands represent change in P-p66<sup>Shc</sup> levels relative to DMSO-treated control. B, cytoplasmic histone-associated apoptotic DNA fragmentation in PC-3 cells following 24 h of co-treatment with the indicated concentrations of PEITC and/or PKC $\beta$ -I. Results are expressed as enrichment factor relative to DMSO-treated control. *Columns*, mean (n=3); *bars*, SE. Significantly different ( $P<0.05$ ) compared with <sup>a</sup>DMSO-treated control, and <sup>b</sup>PEITC alone treatment group by one-way ANOVA followed by Bonferroni's multiple comparison test.
