# Supplementary material
Source: PubMed Central journal article supplement (PMC2855757)

Supplemental Figure S1

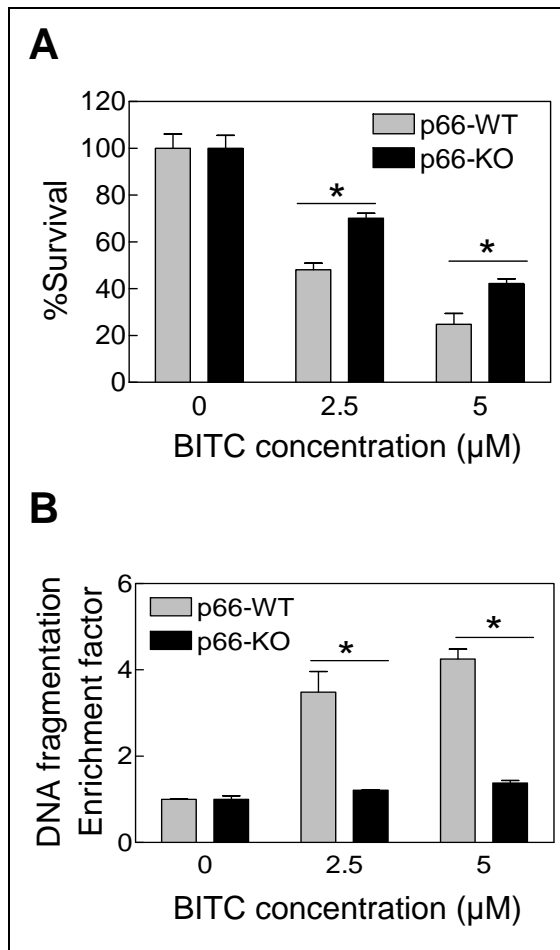

Supplement: NIHMS179667-supplement-Figure_S1.pdf [file NIHMS179667-supplement-Figure_S1.pdf]

Supplemental Figure S2

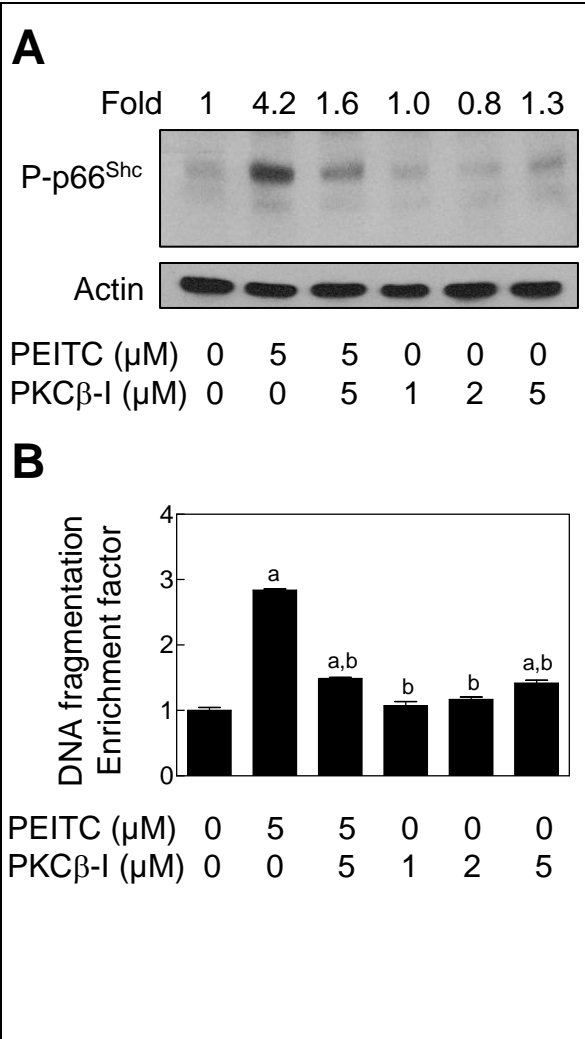

Supplement: NIHMS179667-supplement-Figure_S2.pdf [file NIHMS179667-supplement-Figure_S2.pdf]
